# Supplementary material for: Pulmonary Vein Isolation Outcome Degree Is a New Score for Efficacy of Atrial Fibrillation Catheter Ablation
Source: MDPI journal article supplement (doi:10.3390/jcm10245827), 2021-12-13
Supplement: s1 [file s1]

Figure S1(A)

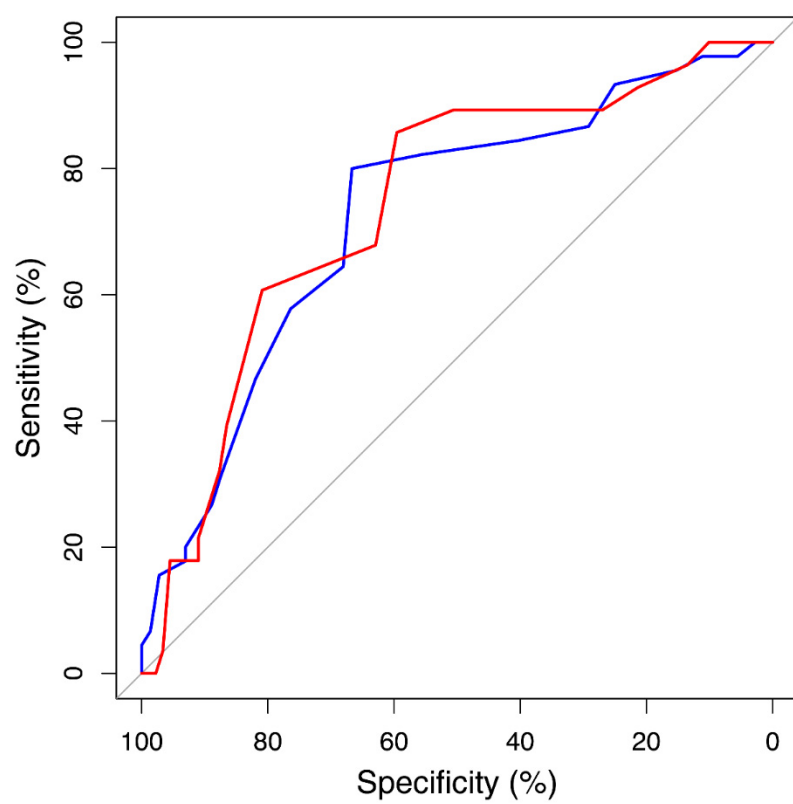

Figure S1(B)

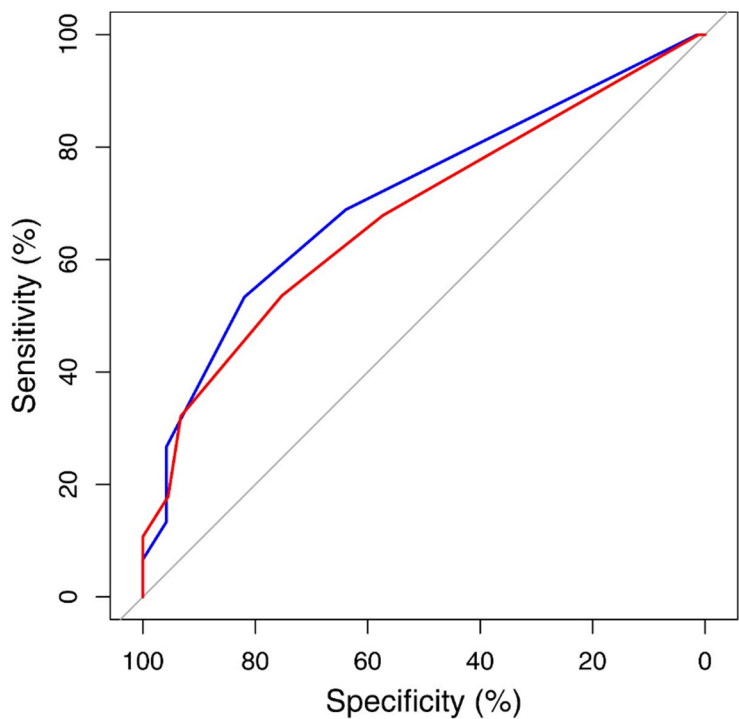

Figure S1(C)

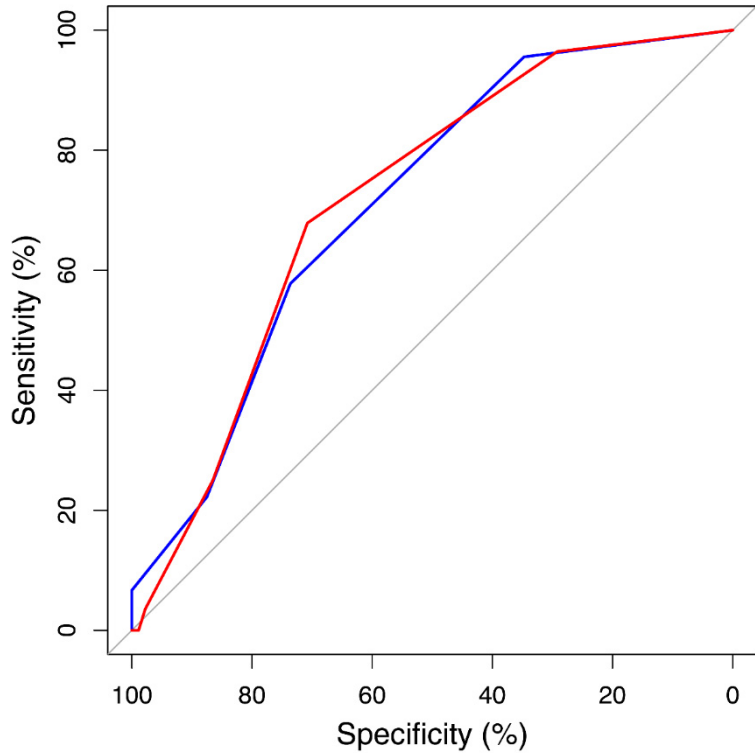

**Figure S1.** Receiver operating characteristic (ROC) curves for left atrial diameter (**A**), LVEF (**B**) and CHA<sub>2</sub>DS<sub>2</sub>-VASc score (**C**). Blue curve: procedural success compared with procedural failure; red curve: procedural and clinical success compared with procedural and clinical failure.
